# Supplementary material for: Dendritic cells direct circadian anti-tumour immune responses
Source: PubMed Central journal article supplement (PMC9891997; doi:10.1038/s41586-022-05605-0), 2022-12-05
Supplement: 41586_2022_5605_MOESM1_ESM.pdf [file 41586_2022_5605_MOESM1_ESM.pdf]

**Supplementary information**

---

**Dendritic cells direct circadian anti-tumour immune responses**

---

In the format provided by the authors and unedited

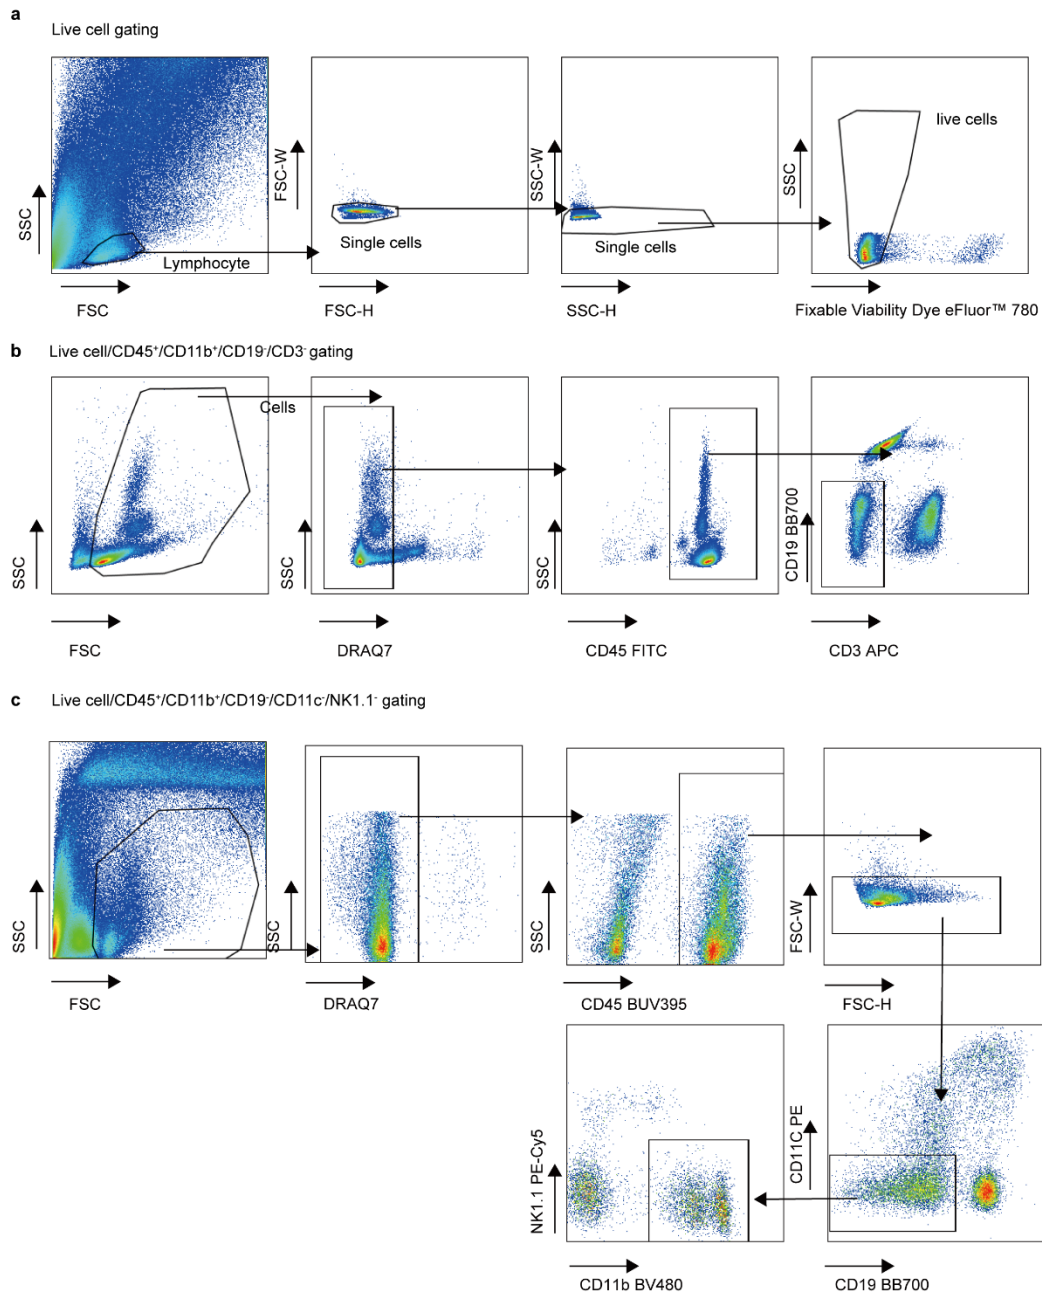

### Supplementary Information Figure 1

(a) Gating strategy of CD8 and CD4 T cell in tumor, relevant to Fig 1f, Extended Fig 2b. (b-c) Gating strategy relevant to Extended Fig e-i.

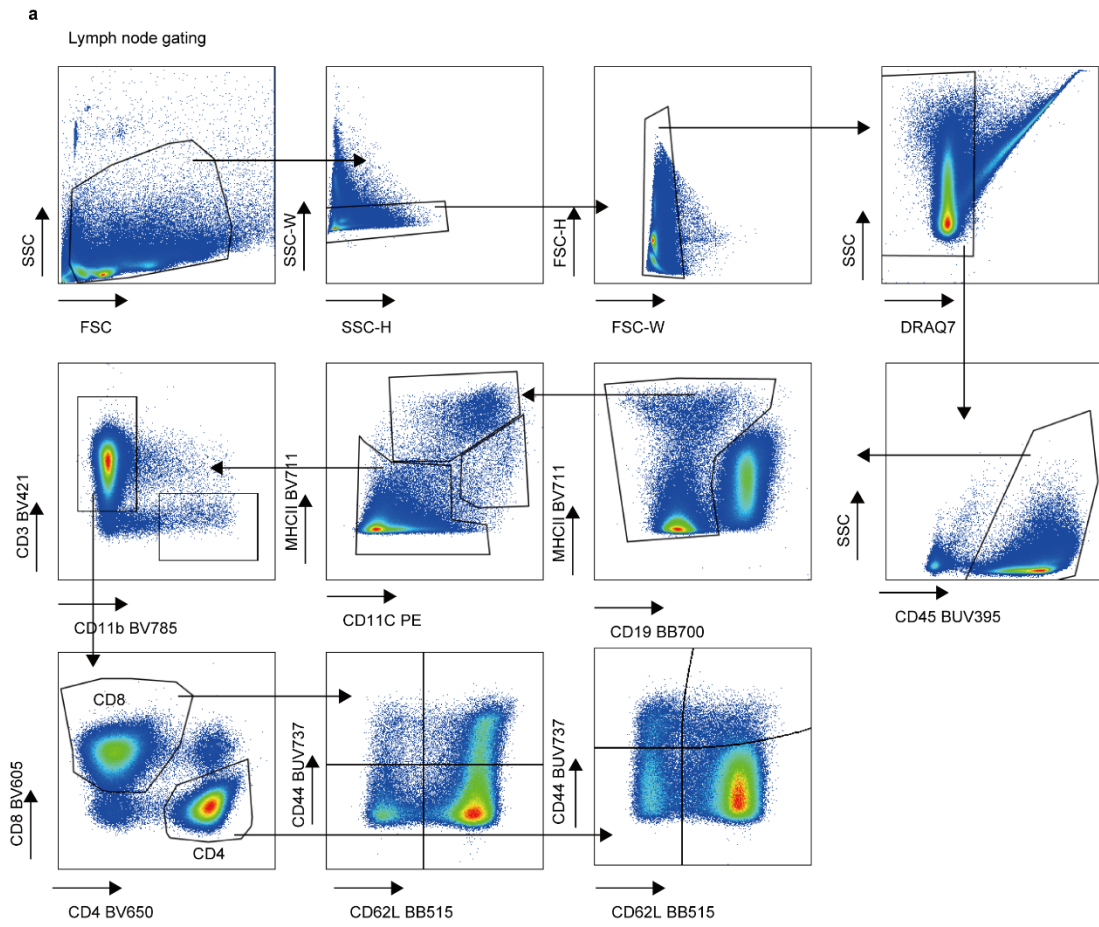

## Supplementary Information Figure 2

(a) Gating strategy of cells in lymph node, relevant to Fig 2, 4-5, Extended Fig 3-4,10.

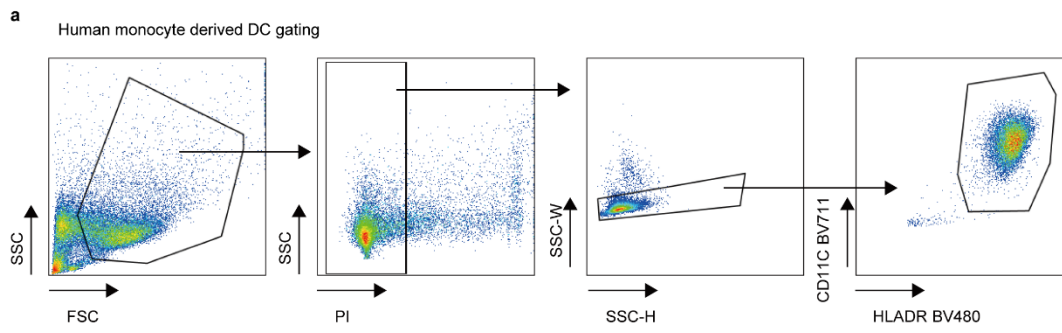

### Supplementary Information Figure 3

(a) Gating strategy of human monocyte derived dendritic cell, relevant to Fig 5g.
